# Supplementary material for: Evaluating the transfer learning from metals to oxides with GAME-Net-Ox
Source: Royal Society of Chemistry journal article supplement (doi:10.1039/d5dd00331h), 2025-12-03
Supplement: d5dd00331h1.pdf [file d5dd00331h1.pdf]

# Supplementary Information: Evaluating the Transfer Learning from Metals to Oxides with GAME-Net-Ox

Thomas Van Hout,<sup>a,b</sup> Oliver Loveday,<sup>a,c</sup> Jordi Morales-Vidal,<sup>a</sup> Santiago Morandi,<sup>a</sup> and Núria López<sup>\*,a</sup>

<sup>a</sup> *Institute of Chemical Research of Catalonia, The Barcelona Institute of Science and Technology (ICIQ-CERCA), Av. Països Catalans 16, 43007, Tarragona, Spain.*

<sup>b</sup> *Eindhoven University of Technology, Den Dolech 25612 AZ Eindhoven, The Netherlands.*

<sup>c</sup> *Department of Physical and Inorganic Chemistry, Universitat Rovira i Virgili, Campus Sescelades, N4 Block, C. Marcel·lí Domingo 1, 43007, Tarragona, Spain.*

<sup>\*</sup> *Corresponding author. E-mail: nlopez@iciq.es*

(Dated: 5 November 2025)

## S1. SUPPLEMENTARY FIGURES

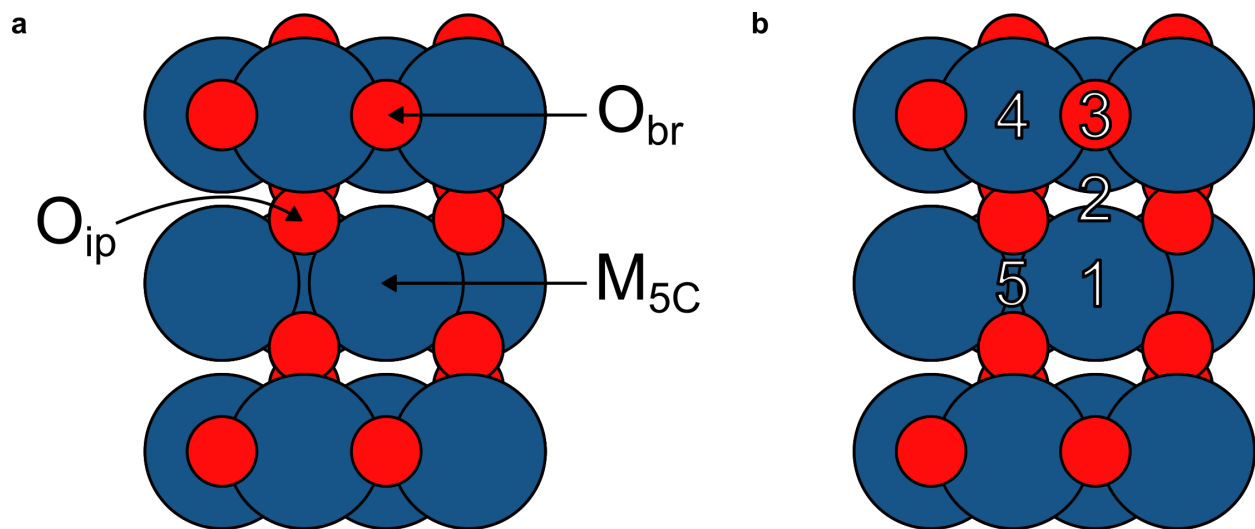

FIG. S1: Rutile (110) surfaces and adsorption sites,  $r\text{-MO}_2$  surface top view. **a** Type of surface atoms:  $M_{5C}$ : 5-coordinated metal,  $O_{br}$ : Bridge Oxygen,  $O_{ip}$ : In-plane Oxygen. **b** Considered sites for initial adsorbate placement: (1) Top  $M_{5C}$  site, (2) Hollow  $M_{5C}-O_{br}$  site, (3) Top  $O_{br}$  site, (4) Bridge  $O_{br}$  site, and (5) Hollow  $M_{5C}-O_{ip}$  site.

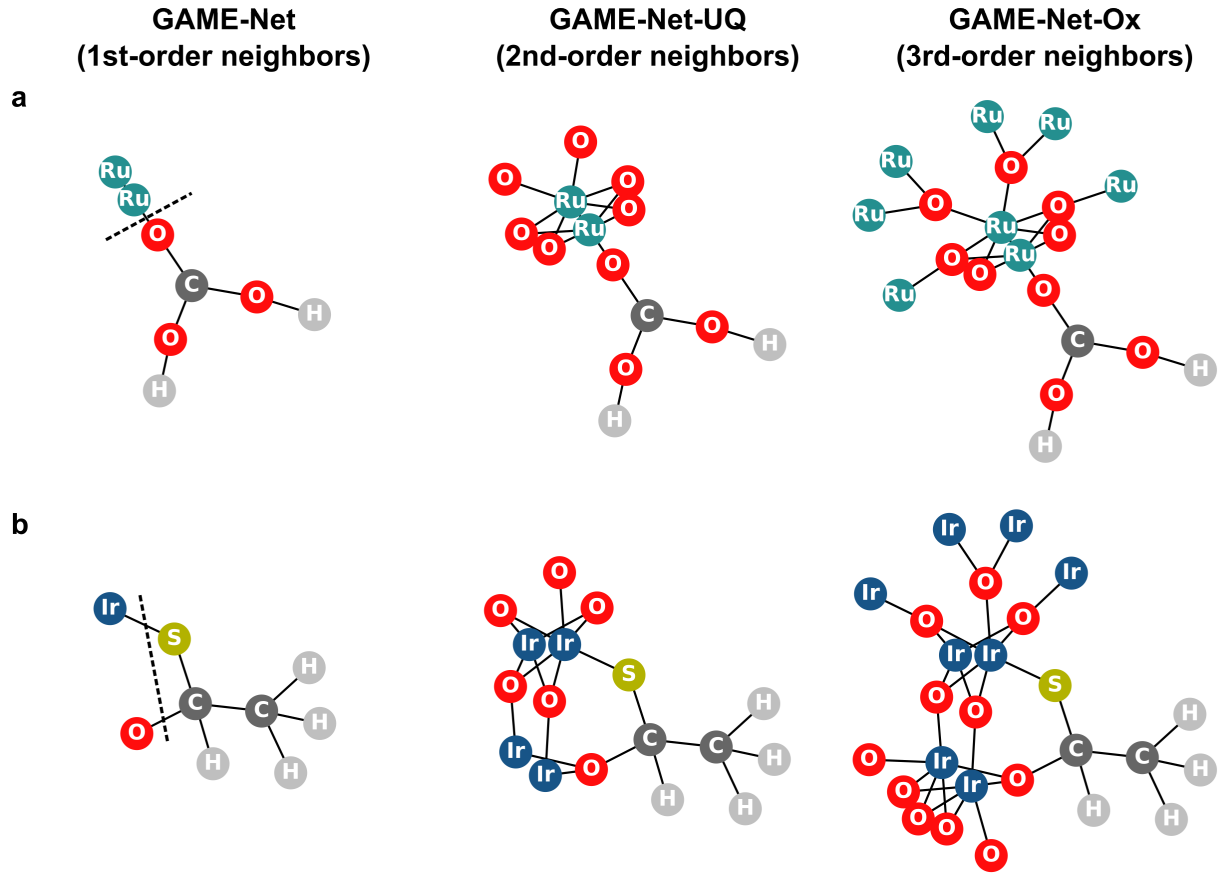

FIG. S2: Example of graph representations for **a** carbonic acid  $\text{CH}_2\text{O}_3$  on  $\text{RuO}_2(110)$  and **b** ethanethiol  $\text{C}_2\text{H}_4\text{S}$  on  $\text{IrO}_2(110)$  adsorption structures, as function of the surface neighbor order with respect to the adsorbate. GAME-Net-Ox employs the most extended surface representation, which includes the 3<sup>rd</sup> order neighbors and the coordination number (CN). Note that the graph representation employed by GAME-Net is not suitable to retrieve the composition of the oxide surface.

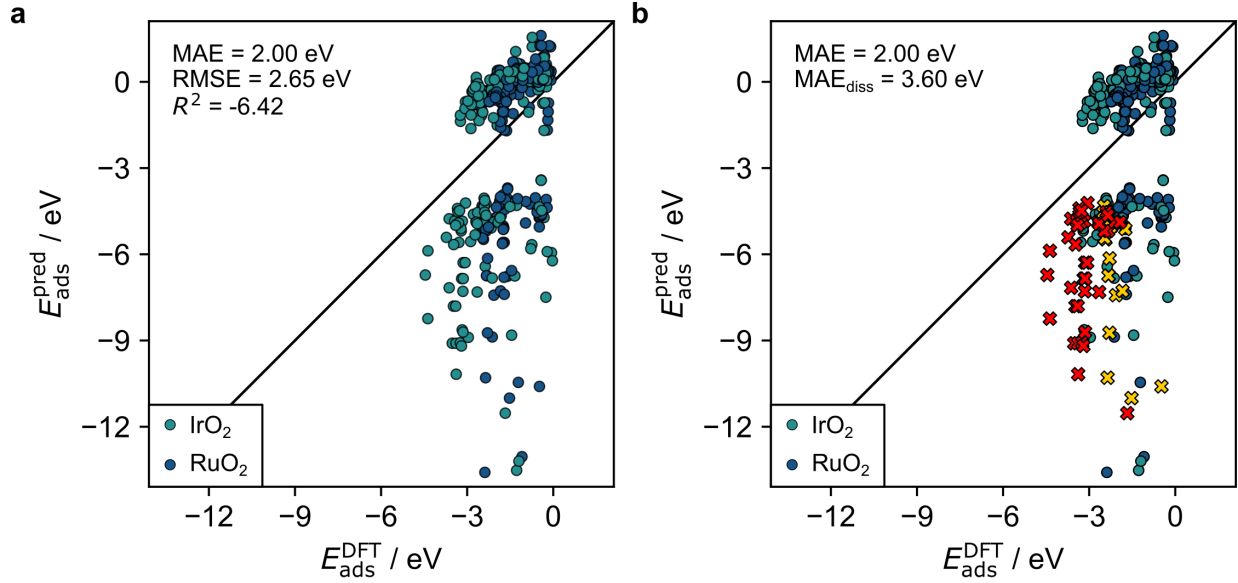

FIG. S3: Parity plots of GAME-Net predicted, *vs.* DFT adsorption energies on conductive oxides ( $\text{IrO}_2$  and  $\text{RuO}_2$ ,  $n=536$ ). **a** All adsorption configurations. **b** The same data with proton-dissociation events highlighted as crosses for  $\text{IrO}_2$  (red) and  $\text{RuO}_2$  (yellow).

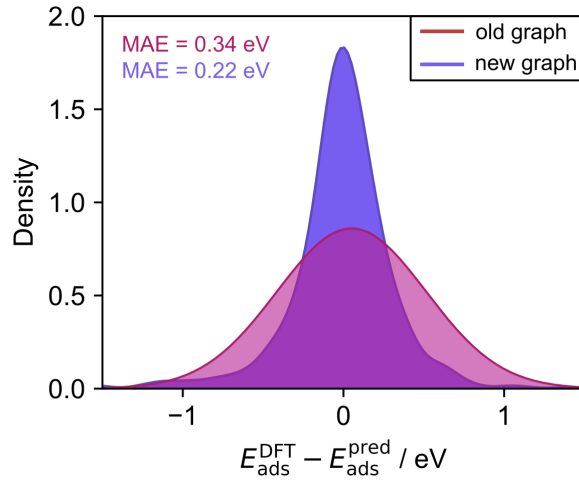

FIG. S4: Distribution of prediction errors and associated MAE when using the original GAME-Net graph representation (red) and when including the coordination number (CN) and the 3<sup>rd</sup> order neighbors for the surface atoms (blue) for the model trained on conductive  $\text{IrO}_2$  and  $\text{RuO}_2$  metal oxides.

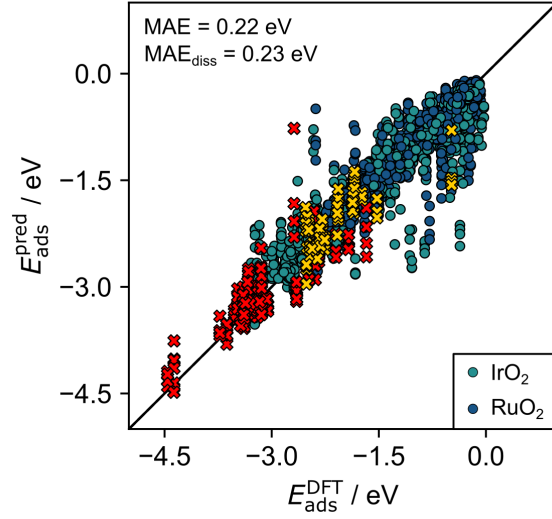

FIG. S5: Parity plot of predicted *vs.* DFT adsorption energies for GAME-Net-Ox on conductive oxides ( $\text{IrO}_2$ ,  $\text{RuO}_2$ ). Cross-shaped points correspond to proton-dissociations for  $\text{IrO}_2$  (red) and  $\text{RuO}_2$  (yellow) ( $n=2096$ ).

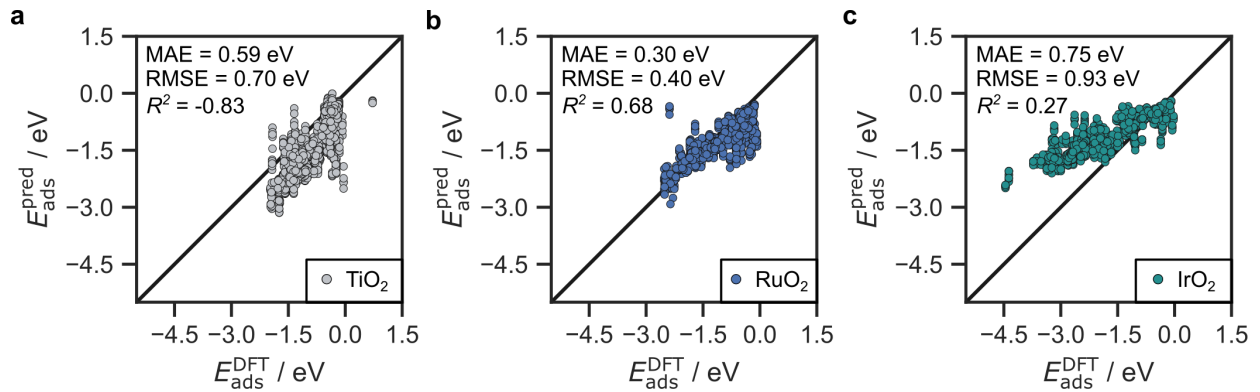

FIG. S6: Parity plots evaluating model metal oxide generalization. The tests show the model: **a** trained on  $\text{IrO}_2$  and  $\text{RuO}_2$  and tested on  $\text{TiO}_2$  ( $n=1680$ ), **b** trained on  $\text{IrO}_2$  and  $\text{TiO}_2$  and tested on  $\text{RuO}_2$  ( $n=1350$ ), and **c** trained on  $\text{RuO}_2$  and  $\text{TiO}_2$  and tested on  $\text{IrO}_2$  ( $n=1270$ ).

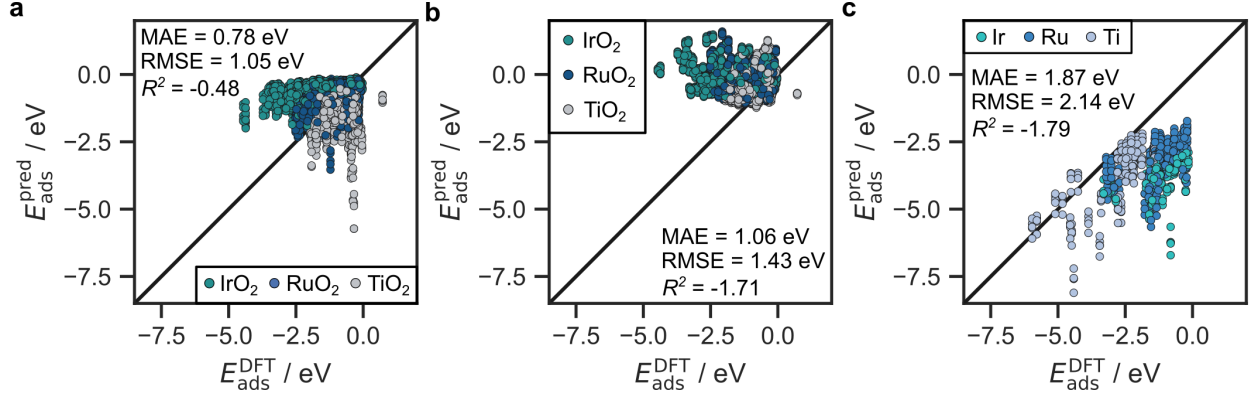

FIG. S7: Parity plots evaluating model transferability between metal and oxide domains. The tests show the model: **a** trained on all metals and tested on all oxides ( $n=4300$ ); **b** trained on a metal subset (Ir, Ru, Ti) and tested on all oxides ( $n=4300$ ), and **c** trained on all oxides and tested on the metal subset ( $n=540$ ).

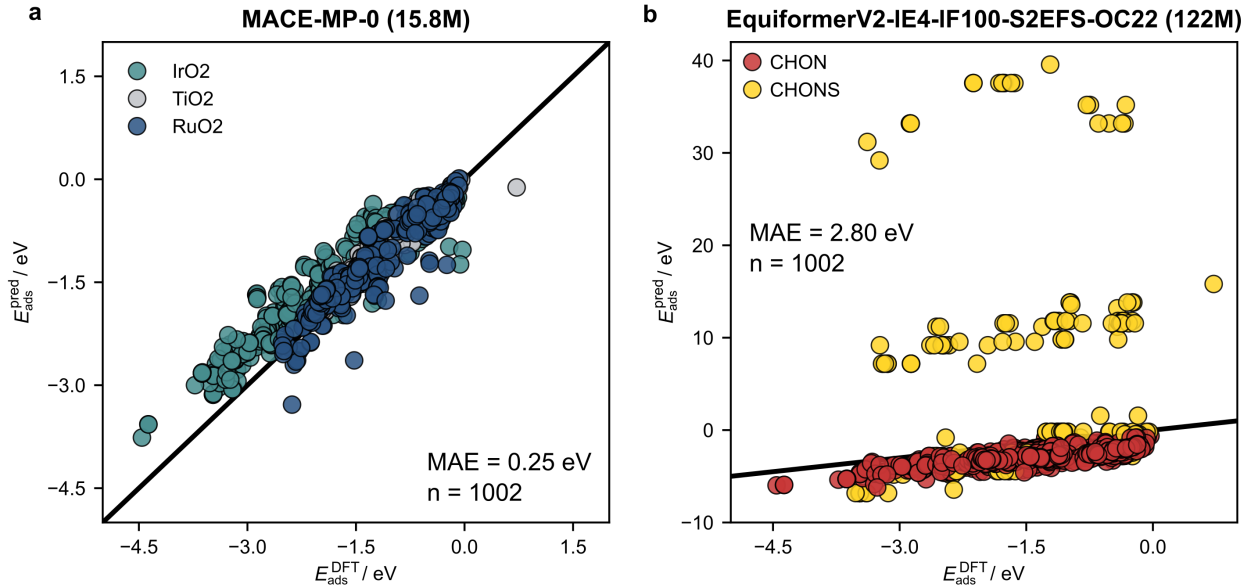

FIG. S8: Performance of **a** MACE-MP-0 and **b** EquiformerV2-OC22 in predicting the DFT adsorption energy starting from the DFT-relaxed structures. Points in panel **b** are colored based on the presence of S in the adsorbate.

## S2. SUPPLEMENTARY TABLES

TABLE S1: List of adsorbates included in the dataset, grouped by adsorbate family.

| Molecule                           | Formula                          |
|------------------------------------|----------------------------------|
| <i>C<sub>x</sub>H<sub>y</sub></i>  |                                  |
| Methane                            | CH <sub>4</sub>                  |
| Ethane                             | C <sub>2</sub> H <sub>6</sub>    |
| Propane                            | C <sub>3</sub> H <sub>8</sub>    |
| Ethene                             | C <sub>2</sub> H <sub>4</sub>    |
| Propylene                          | C <sub>3</sub> H <sub>6</sub>    |
| Acetylene                          | C <sub>2</sub> H <sub>2</sub>    |
| Prop-1-yne                         | C <sub>3</sub> H <sub>4</sub>    |
| <i>C<sub>x</sub>H<sub>y</sub>O</i> |                                  |
| Methanol                           | CH <sub>3</sub> OH               |
| Ethanol                            | C <sub>2</sub> H <sub>5</sub> OH |
| Propan-2-ol                        | C <sub>3</sub> H <sub>7</sub> OH |
| Formaldehyde                       | CH <sub>2</sub> O                |
| Acetaldehyde                       | C <sub>2</sub> H <sub>4</sub> O  |
| Propan-2-one                       | C <sub>3</sub> H <sub>6</sub> O  |
| Methoxymethane                     | CH <sub>3</sub> OCH <sub>3</sub> |
| <i>C<sub>x</sub>H<sub>y</sub>S</i> |                                  |
| Methanethiol                       | CH <sub>3</sub> SH               |
| Methanethial                       | CH <sub>2</sub> S                |
| Ethanethiol                        | C <sub>2</sub> H <sub>5</sub> SH |
| Ethanethial                        | C <sub>2</sub> H <sub>4</sub> S  |
| Propane-2-thiol                    | C <sub>3</sub> H <sub>7</sub> SH |
| Propane-2-thione                   | C <sub>3</sub> H <sub>6</sub> S  |
| Dimethylsulfane                    | CH <sub>3</sub> SCH <sub>3</sub> |

| Molecule                                             | Formula                                       |
|------------------------------------------------------|-----------------------------------------------|
| <i>Amines</i>                                        |                                               |
| Methanamine                                          | CH <sub>3</sub> NH <sub>2</sub>               |
| Ethanamine                                           | C <sub>2</sub> H <sub>5</sub> NH <sub>2</sub> |
| Propan-2-amine                                       | C <sub>3</sub> H <sub>7</sub> NH <sub>2</sub> |
| Trimethylamine                                       | (CH <sub>3</sub> ) <sub>3</sub> N             |
| <i>Imines</i>                                        |                                               |
| Methanimine                                          | CH <sub>2</sub> NH                            |
| Ethanimine                                           | C <sub>2</sub> H <sub>3</sub> NH              |
| Propan-2-imine                                       | C <sub>3</sub> H <sub>5</sub> NH              |
| N-methylmethanimine                                  | CH <sub>3</sub> N=CH <sub>2</sub>             |
| <i>C<sub>x</sub>H<sub>y</sub>O<sub>n=(2,3)</sub></i> |                                               |
| Carbonic acid                                        | H <sub>2</sub> CO <sub>3</sub>                |
| Formic acid                                          | HCOOH                                         |
| Acetic acid                                          | CH <sub>3</sub> COOH                          |
| <i>Carbamate esters</i>                              |                                               |
| Carbamic acid                                        | NH <sub>2</sub> COOH                          |
| <i>Amides</i>                                        |                                               |
| Formamide                                            | HCONH <sub>2</sub>                            |
| Acetamide                                            | CH <sub>3</sub> CONH <sub>2</sub>             |
| <i>Oximes</i>                                        |                                               |
| Formaldoxime                                         | CH <sub>2</sub> NOH                           |
| <i>Amidines</i>                                      |                                               |
| Formimidamide                                        | HN=CHNH <sub>2</sub>                          |
| Acetimidamide                                        | CH <sub>3</sub> N=CHNH <sub>2</sub>           |

TABLE S2: Statistics related to the DFT structures  $\rightarrow$  graph post-filtering process for isomorphic graphs. Values obtained with the conversion parameters defined in the Manuscript.

| <b>Material</b>  | <b>DFT<br/>relaxations</b> | <b>Unique<br/>graphs</b> | <b>Filtered<br/>graphs</b> | <b>Conversion<br/>[%]</b> |
|------------------|----------------------------|--------------------------|----------------------------|---------------------------|
| RuO <sub>2</sub> | 302                        | 270                      | 32                         | 89.4                      |
| IrO <sub>2</sub> | 313                        | 254                      | 59                         | 81.2                      |
| TiO <sub>2</sub> | 387                        | 336                      | 51                         | 86.8                      |
| <b>Total</b>     | 1002                       | 860                      | 142                        | 85.8                      |

TABLE S3: GAME-Net-Ox architecture and number of parameters for each internal layer. Table obtained with `torchinfo` Python package. PMA=Pooling by Multi-head Attention; MAB=Multi-head Attention Block.

| Layer(type)                 | Sub-layer Parameters |
|-----------------------------|----------------------|
| Linear                      | 3,360                |
| SAGEConv(1) MeanAggregation |                      |
| Linear                      | 25,600               |
| Linear                      | 25,600               |
| SAGEConv(2) MeanAggregation |                      |
| Linear                      | 25,600               |
| Linear                      | 25,600               |
| SAGEConv(3) MeanAggregation |                      |
| Linear                      | 25,600               |
| Linear                      | 25,600               |
| TAGConv SumAggregation      |                      |
| Linear                      | 25,600               |
| Linear                      | 320                  |
| PMA                         | 160                  |
| MAB Linear                  | 25,600               |
| Linear                      | 25,600               |
| Linear                      | 25,600               |
| Linear                      | 25,600               |
| Total                       | 387,840              |

TABLE S4: GAME-Net architecture and number of parameters for each internal layer. Table obtained with `torchinfo` Python package. The `GraphMultisetTransformer` pooling layer relies on Pytorch Geometric 2.0.3. PMA=Pooling by Multi-head Attention.

| Layer(type)              | Sub-layer Parameters |
|--------------------------|----------------------|
| Linear                   | 3,040                |
| SAGEConv(1)              |                      |
| Linear                   | 25,600               |
| Linear                   | 25,600               |
| SAGEConv(2)              |                      |
| Linear                   | 25,600               |
| Linear                   | 25,600               |
| SAGEConv(3)              |                      |
| Linear                   | 25,600               |
| Linear                   | 25,600               |
| GraphMultisetTransformer |                      |
| Linear                   | 25,760               |
| Linear                   | 161                  |
| PMA                      | 103,200              |
| Total                    | 285,761              |

TABLE S5: Game-Net-UQ architecture and number of parameters for each internal layer. Table obtained with `torchinfo` Python package. Due to breaking changes after Pytorch Geometric 2.0.3, the `GraphMultisetTransformer` pooling layer has been implemented manually by the authors. PMA=Pooling by Multi-head Attention; MAB=Multi-head Attention Block.

| Layer(type)                 | Sub-layer Parameters |
|-----------------------------|----------------------|
| Linear                      | 3,840                |
| SAGEConv(1) MeanAggregation |                      |
| Linear                      | 36,864               |
| Linear                      | 36,864               |
| SAGEConv(2) MeanAggregation |                      |
| Linear                      | 36,864               |
| Linear                      | 36,864               |
| SAGEConv(3) MeanAggregation |                      |
| Linear                      | 36,864               |
| Linear                      | 36,864               |
| TAGConv SumAggregation      |                      |
| Linear                      | 36,864               |
| Linear                      | 384                  |
| PMA                         | 192                  |
| MAB Linear                  | 36,864               |
| Linear                      | 36,864               |
| Linear                      | 36,864               |
| Linear                      | 36,864               |
| Total                       | 557,376              |

TABLE S6: Dissociative adsorptions included in the dataset, grouped by family and surface of dissociation.

| Molecule                                             | Formula                             | Surface                             |
|------------------------------------------------------|-------------------------------------|-------------------------------------|
| <i>C<sub>x</sub>H<sub>y</sub></i>                    |                                     |                                     |
| Prop-1-yne                                           | C <sub>3</sub> H <sub>4</sub>       | RuO <sub>2</sub>                    |
| <i>C<sub>x</sub>H<sub>y</sub>O</i>                   |                                     |                                     |
| Acetaldehyde                                         | C <sub>2</sub> H <sub>4</sub> O     | IrO <sub>2</sub>                    |
| Ethanol                                              | C <sub>2</sub> H <sub>5</sub> OH    | IrO <sub>2</sub>                    |
| Methanol                                             | CH <sub>3</sub> OH                  | IrO <sub>2</sub>                    |
| <i>C<sub>x</sub>H<sub>y</sub>S</i>                   |                                     |                                     |
| Ethanethiol                                          | C <sub>2</sub> H <sub>5</sub> SH    | IrO <sub>2</sub> , RuO <sub>2</sub> |
| Methanethiol                                         | CH <sub>3</sub> SH                  | IrO <sub>2</sub> , RuO <sub>2</sub> |
| Propane-2-thiol                                      | C <sub>3</sub> H <sub>7</sub> SH    | IrO <sub>2</sub> , RuO <sub>2</sub> |
| Propane-2-thione                                     | C <sub>3</sub> H <sub>6</sub> S     | IrO <sub>2</sub>                    |
| <i>Imines</i>                                        |                                     |                                     |
| N-methylmethanimine                                  | CH <sub>3</sub> N=CH <sub>2</sub>   | IrO <sub>2</sub>                    |
| <i>C<sub>x</sub>H<sub>y</sub>O<sub>n=(2,3)</sub></i> |                                     |                                     |
| Acetic acid                                          | CH <sub>3</sub> COOH                | IrO <sub>2</sub> , RuO <sub>2</sub> |
| Carbonic acid                                        | H <sub>2</sub> CO <sub>3</sub>      | IrO <sub>2</sub> , RuO <sub>2</sub> |
| Formic acid                                          | HCOOH                               | IrO <sub>2</sub> , RuO <sub>2</sub> |
| <i>Carbamate esters</i>                              |                                     |                                     |
| Carbamic acid                                        | NH <sub>2</sub> COOH                | IrO <sub>2</sub> , RuO <sub>2</sub> |
| <i>Amides</i>                                        |                                     |                                     |
| Acetamide                                            | CH <sub>3</sub> CONH <sub>2</sub>   | IrO <sub>2</sub>                    |
| Formamide                                            | HCONH <sub>2</sub>                  | IrO <sub>2</sub> , RuO <sub>2</sub> |
| <i>Oximes</i>                                        |                                     |                                     |
| Formaldoxime                                         | CH <sub>2</sub> NOH                 | IrO <sub>2</sub> , RuO <sub>2</sub> |
| <i>Amidines</i>                                      |                                     |                                     |
| Acetimidamide                                        | CH <sub>3</sub> N=CHNH <sub>2</sub> | IrO <sub>2</sub>                    |
| Formimidamide                                        | HN=CHNH <sub>2</sub>                | IrO <sub>2</sub>                    |

TABLE S7: Performance of MACE-MP-0 and EquiformerV2-122M ML interatomic potentials (MLIPs) on predicting the DFT adsorption energy on rutile oxides. The EquiformerV2 model checkpoint is named **EquiformerV2-1E4-1F100-S2EFS-0C22**, and included in the FairChem-V1 GitHub repository. Mean Absolute Error (MAE) values are in eV.  $\text{MAE}_{\text{RS}}$  refers to the MLIP predictions obtained by running a single-point on the DFT-relaxed structures (VASP CONTCAR file).  $\mathbf{n}^*$  and  $\mathbf{MAE}_{\text{RS}}^*$  neglect adsorption structures with S-containing adsorbates as Equiformer has not been trained with these systems.

|                        | <b>MACE-MP-0 (15.8M)</b> |                         | <b>EquiformerV2-122M (0C22)</b> |                         |                      |                                     |
|------------------------|--------------------------|-------------------------|---------------------------------|-------------------------|----------------------|-------------------------------------|
| <b>Material</b>        | <b>n</b>                 | <b>MAE<sub>RS</sub></b> | <b>n</b>                        | <b>MAE<sub>RS</sub></b> | <b>n<sup>*</sup></b> | <b>MAE<sub>RS</sub><sup>*</sup></b> |
| RuO <sub>2</sub> (110) | 302                      | 0.18                    | 302                             | 3.22                    | 246                  | 1.53                                |
| IrO <sub>2</sub> (110) | 313                      | 0.46                    | 313                             | 3.51                    | 249                  | 1.46                                |
| TiO <sub>2</sub> (110) | 387                      | 0.14                    | 387                             | 1.91                    | 314                  | 1.22                                |
| Total                  | 1002                     | 0.25                    | 1002                            | 2.80                    | 809                  | 1.39                                |
